# Supplementary material for: A refractory metal-based photonic narrowband emitter for thermophotovoltaic energy conversion
Source: Royal Society of Chemistry journal article supplement (doi:10.1039/d2tc04644j), 2023-01-01
Supplement: d2tc04644j1.pdf [file d2tc04644j1.pdf]

## Supplementary materials

# **Refractory metal-based photonic narrowband emitter for thermophotovoltaic energy conversion**

Fangqi Chen,<sup>1</sup> Xiaojie Liu,<sup>1</sup> Yang Liu,<sup>1</sup> Yanpei Tian<sup>1</sup> and Yi Zheng<sup>1,2,\*</sup>

<sup>1</sup>Department of Mechanical and Industrial Engineering, Northeastern University, Boston, MA 02115, USA.

<sup>2</sup>Department of Electrical and Computer Engineering, Northeastern University, Boston, MA 02115, USA.

E-mail: [y.zheng@northeastern.edu](mailto:y.zheng@northeastern.edu)

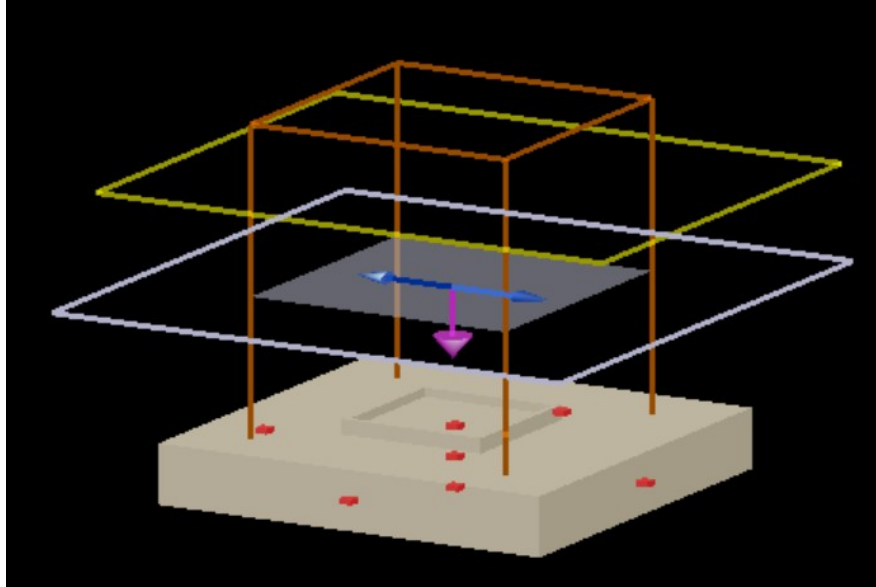

Fig. S1. Schematic of the FDTD calculation for the metal residue.

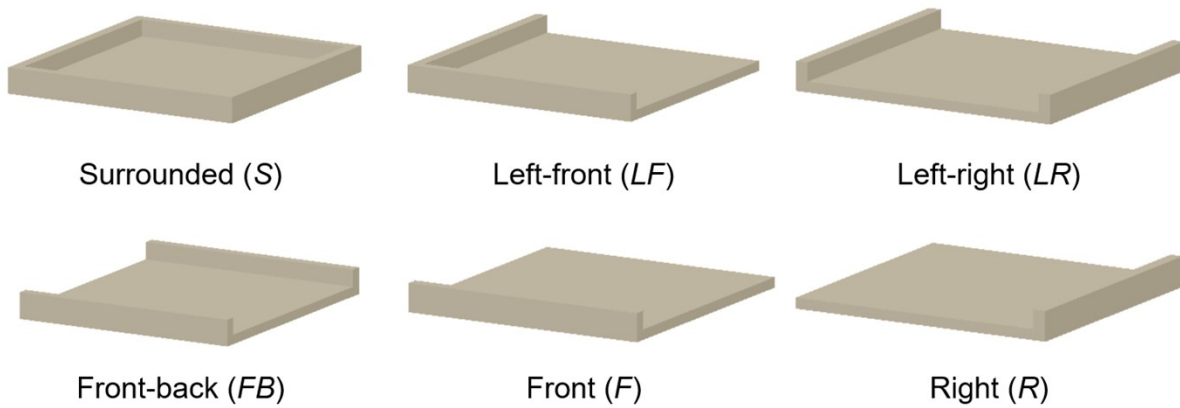

Fig. S2. Schematic of sidewall cases. The tungsten substrate is excluded.
